# Supplementary material for: Co-Action of Ionic Liquids with Alternative Sorbents for Removal of Reactive Azo Dyes from Polluted Wastewater Streams
Source: MDPI journal article supplement (doi:10.3390/app14020673), 2024-01-12
Supplement: s1 [file s1]

Archive with 2 entries (2 files):
- File S1SupplementaryMaterials.pdf
- File S2SupplementaryMaterials.xlsx
