# Supplementary material for: Co-Action of Ionic Liquids with Alternative Sorbents for Removal of Reactive Azo Dyes from Polluted Wastewater Streams
Source: MDPI journal article supplement (doi:10.3390/app14020673), 2024-01-12
Supplement: s1 [file s1 › File S1SupplementaryMaterials.pdf]

Supplementary Materials

# Co-Action of Ionic Liquids with Alternative Sorbents for Removal of Reactive Azo Dyes from Polluted Wastewater Streams

Barbora Kamenická <sup>1</sup>, Kateřina Maňásková <sup>1</sup>, Miloslav Pouzar <sup>1,2</sup> and Tomáš Weidlich <sup>1,\*</sup>

<sup>1</sup> Chemical Technology Group, Institute of Environmental and Chemical Engineering, Faculty of Chemical Technology, University of Pardubice, Studentská 573, 532 10 Pardubice, Czech Republic

<sup>2</sup> Center of Materials and Nanotechnologies—CEMNAT, Faculty of Chemical Technology, nam. Cs. legii 565, 530 02 Pardubice, Czech Republic

\* Correspondence: tomas.weidlich@upce.cz; Tel.: +420-46-603-8049

**Number of pages:** 9

**Number of Tables:** 1

**Number of Schemes:** 2

**Number of Figures:** 8

## Report of Elemental Analysis

Date of analysis: 15. 12. 2023, 15:03

Sample: Hr Cr

Equipment settings: EDXRF ElvaX, Rh X-ray tube – Light elements 12kV, 8  $\mu$ A, spectrum acquisition 90s; Heavy elements – 35 kV, 6  $\mu$ A, , spectrum acquisition 90s

Composition calculation: General standard-less FPM method without correction – the gross mistake can occur namely in LE calculation due to incompatibility sample matrix composition with model matrix

## Elemental Composition

| Atomic | Element | Series | Intensity | Concentration         |
|--------|---------|--------|-----------|-----------------------|
|        | LE*     |        | 4056116   | 59.5392 $\pm$ 0.0659% |
| 16     | S       | K      | 109707    | 11.2667 $\pm$ 0.1309% |
| 17     | Cl      | K      | 148693    | 14.2230 $\pm$ 0.1212% |
| 19     | K       | K      | 529668    | 7.9292 $\pm$ 0.0340%  |
| 20     | Ca      | K      | 31026     | 0.3836 $\pm$ 0.0257%  |
| 24     | Cr      | K      | 2099395   | 6.6572 $\pm$ 0.0136%  |
| 37     | Rb      | K      | 2147      | 0.0003 $\pm$ 0.0002%  |
| 38     | Sr      | K      | 1568      | 0.0002 $\pm$ 0.0002%  |
| 83     | Bi      | L      | 2600      | 0.0007 $\pm$ 0.0004%  |

\*LE – light elements – recalculation of non-detectable light elements using backscattering intensity (theoretical mean atomic weight of light elements is 13 g/mol)

Spectrum – Sample Hr-Cr – Light elements (Al – Fe)

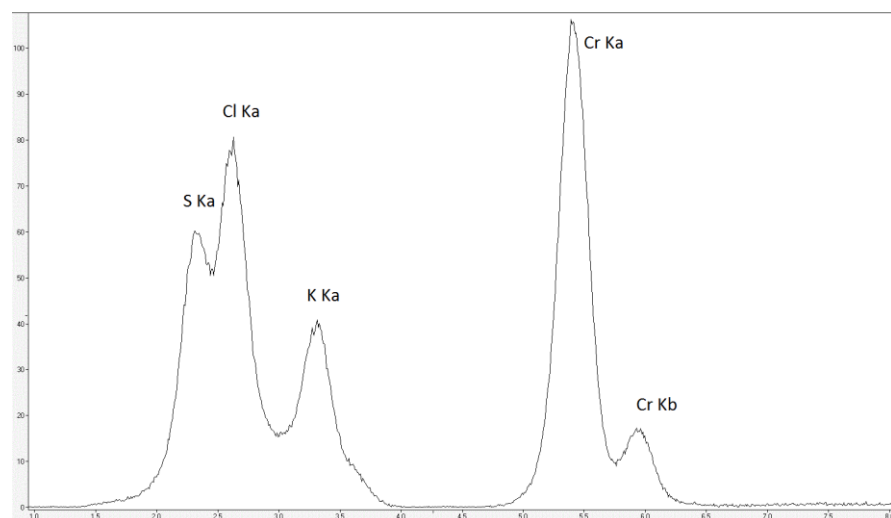

Spectrum – Sample Hr-Cr– Heavy elements (V – U)

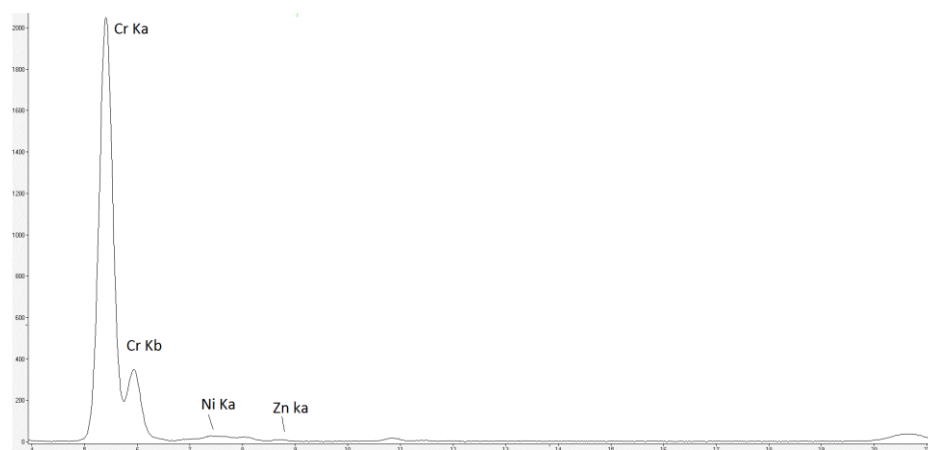**Figure S1.** Report from EDXRF analysis of commercial RB8 sample.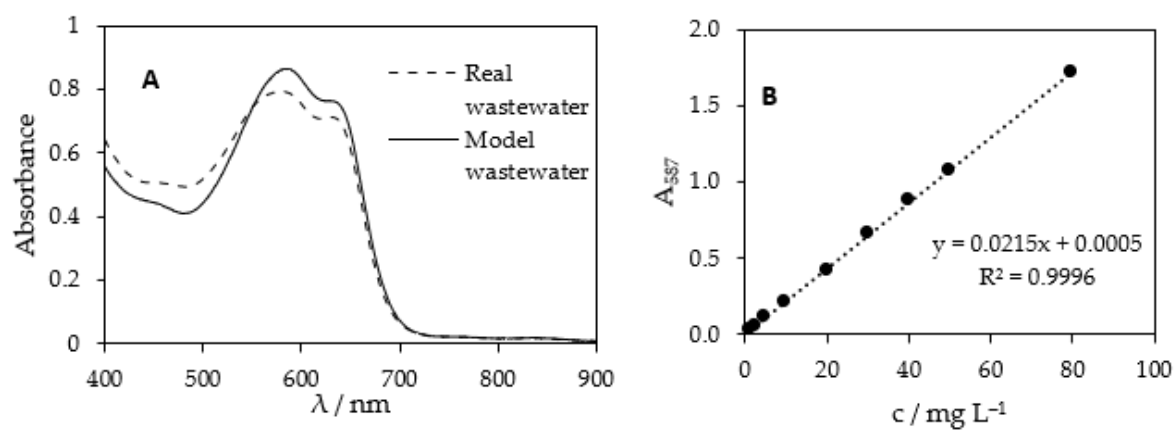**Figure S2.** Absorption spectrum of RB8 in model and real wastewater (A) and calibration curve of model aq. solutions of RB8 (B).

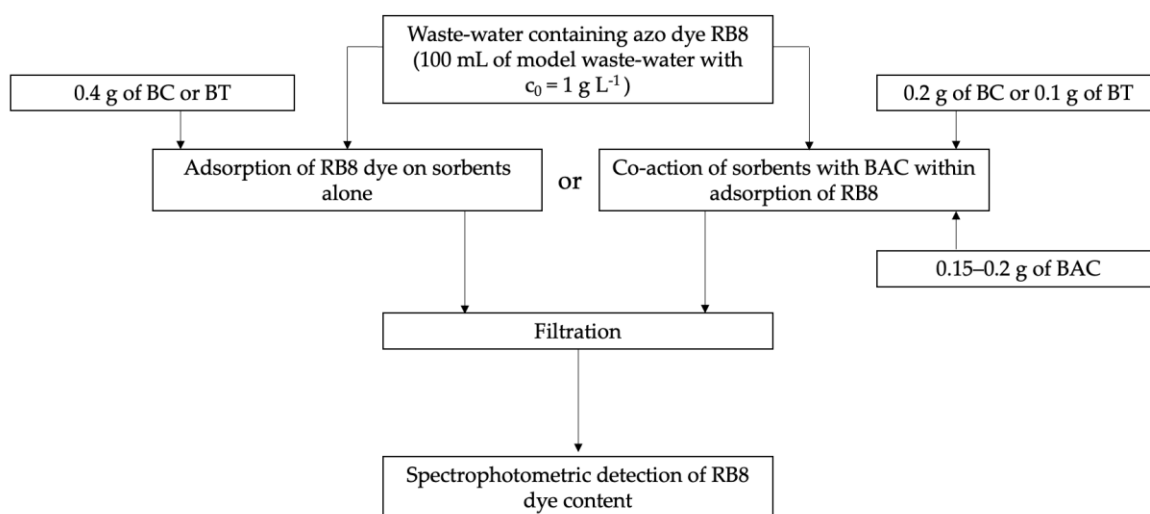

**Scheme S1.** The experimental scope of RB8 separation using alternative sorbents with presence/absence of benzalkonium chloride.

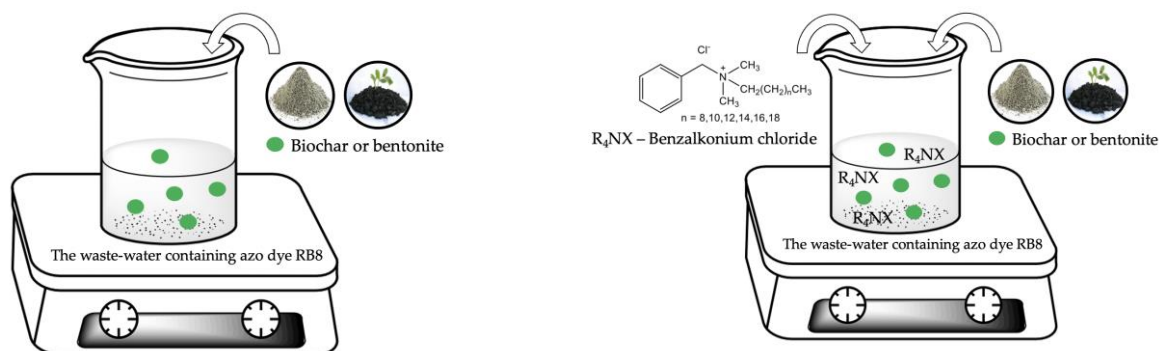

**Figure S3.** The experimental layout of the RB8 separation using alternative sorbents with presence/absence of benzalkonium chloride.

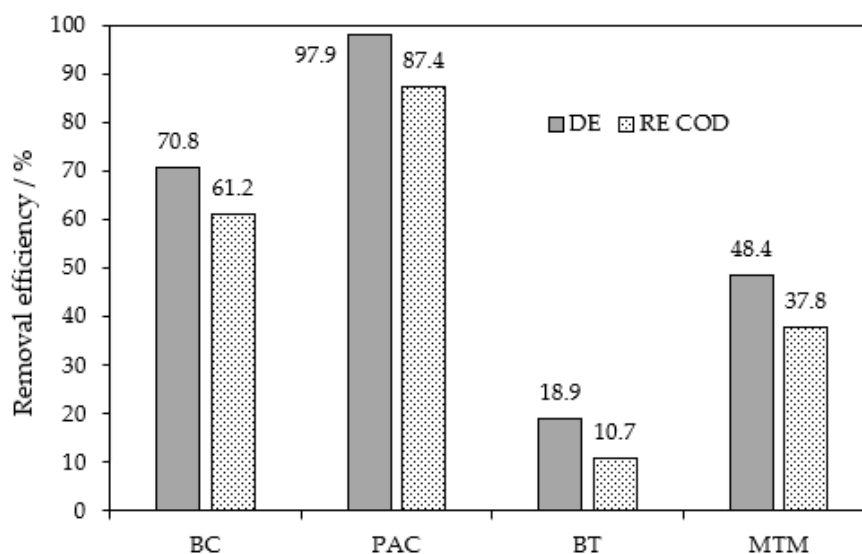

**Figure S4.** Comparison of decolorization efficiency and COD removal of RB8 dye using PAC and MTM (40 g L<sup>-1</sup>) and alternative sorbents BC or BT (each of them 40 g L<sup>-1</sup>) after 5 hours of action.

## Report of Elemental Analysis

Date of analysis: 15. 12. 2023, 15:23

Sample: Bk1

Equipment settings: EDXRF ElvaX, Rh X-ray tube – Light elements 12kV, 8 μA, spectrum acquisition 90s; Heavy elements – 35 kV, 6 μA, , spectrum acquisition 90s

Composition calculation: General standard-less FPM method without correction – the gross mistake can occur namely in LE calculation due to incompatibility sample matrix composition with model matrix

## Elemental Composition

| Atomic | Element | Series | Intensity | Concentration     |
|--------|---------|--------|-----------|-------------------|
|        | LE*     |        | 4782583   | 81.6922 ± 0.0662% |
| 15     | P       | K      | 10200     | 2.2197 ± 0.1618%  |
| 16     | S       | K      | 46738     | 6.8314 ± 0.0905%  |
| 19     | K       | K      | 167601    | 2.9455 ± 0.0322%  |
| 20     | Ca      | K      | 108822    | 1.4602 ± 0.0198%  |
| 24     | Cr      | K      | 1301024   | 4.4879 ± 0.0105%  |
| 26     | Fe      | K      | 154010    | 0.2687 ± 0.0032%  |
| 28     | Ni      | K      | 27206     | 0.0227 ± 0.0014%  |
| 29     | Cu      | K      | 17300     | 0.0107 ± 0.0010%  |
| 30     | Zn      | K      | 133698    | 0.0597 ± 0.0008%  |
| 38     | Sr      | K      | 10020     | 0.0013 ± 0.0002%  |

\*LE – light elements – recalculation of non-detectable light elements using backscattering intensity (theoretical mean atomic weight of light elements is 13 g/mol)

Spectrum – Sample Bk1 – Light elements (Al – Fe)

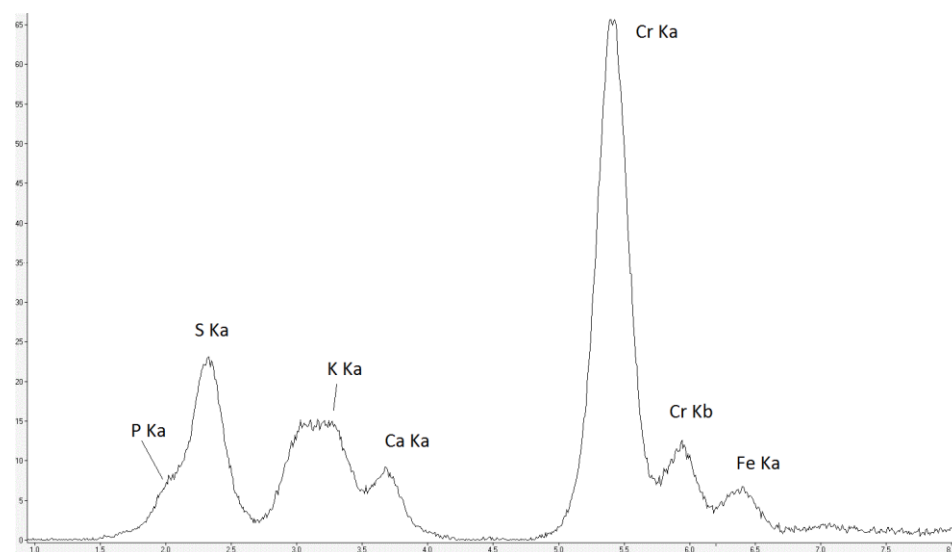**Figure S5.** Report from EDXRF analysis of alternative BC sorbent saturated with RB8 dye.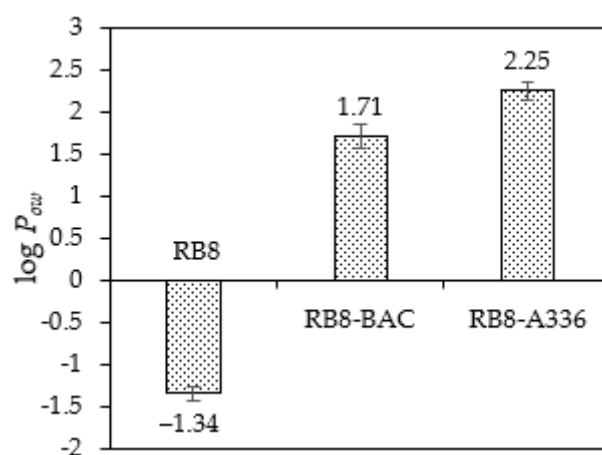**Figure S6.** Comparison of the octan-1-ol/water partition coefficients ( $\log P_{ow}$ ) for the RB8 dye and RB8-based ion-pairs RB8-IL.

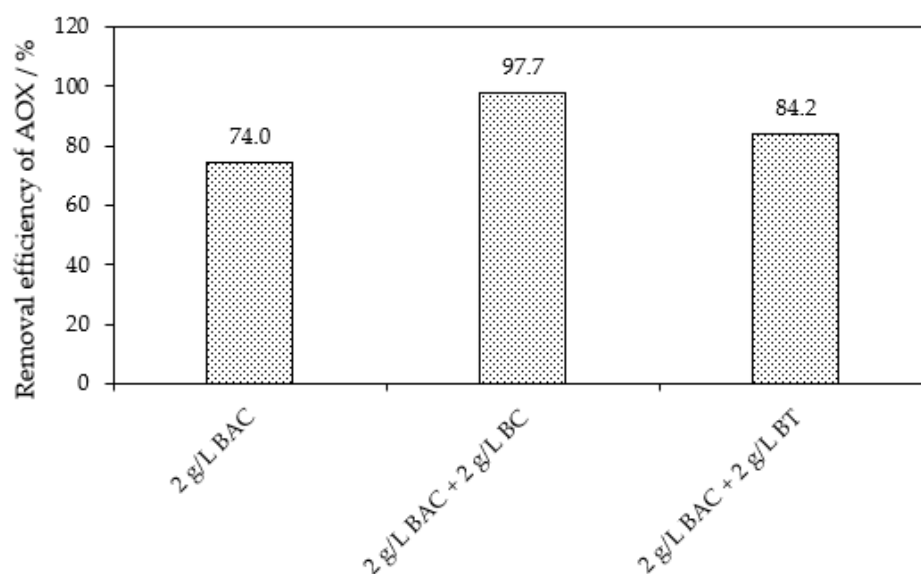

**Figure S7.** Removal of AOX from model aq. solutions of RB8 ( $1 \text{ g L}^{-1}$  aq. model solution) using optimal doses of BAC and BC or BT after 30 minutes of action.

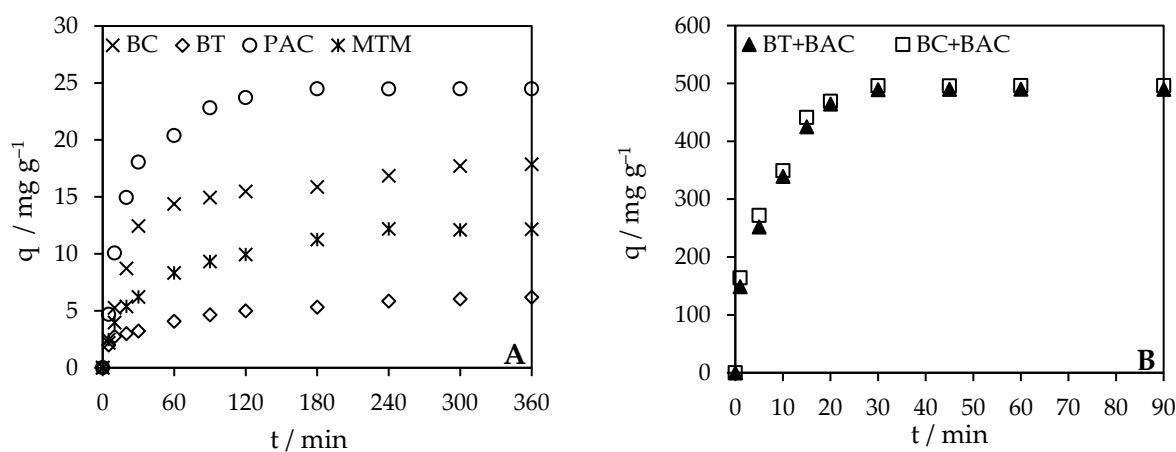

**Figure S8.** Dependencies of adsorption capacity on time within the sorption of RB8 ( $1 \text{ g L}^{-1}$  aq. model solution) on (A) different sorbents ( $40 \text{ g L}^{-1}$ ) and (B) co-action of BC ( $2 \text{ g L}^{-1}$ ) with BAC ( $1.5 \text{ g L}^{-1}$ ) or BT ( $2 \text{ g L}^{-1}$ ) with BAC ( $2 \text{ g L}^{-1}$ ).

## Report of Elemental Analysis

Date of analysis: 15. 12. 2023, 15:12

Sample: Bk2

Equipment settings: EDXRF ElvaX, Rh X-ray tube – Light elements 12kV, 8  $\mu$ A, spectrum acquisition 90s; Heavy elements – 35 kV, 6  $\mu$ A, , spectrum acquisition 90s

Composition calculation: General standard-less FPM method without correction – the gross mistake can occur namely in LE calculation due to incompatibility sample matrix composition with model matrix

## Elemental Composition

| Atomic | Element | Series | Intensity | Concentration         |
|--------|---------|--------|-----------|-----------------------|
|        | LE*     |        | 5570360   | 78.9944 $\pm$ 0.0735% |
| 16     | S       | K      | 23991     | 3.0065 $\pm$ 0.1477%  |
| 17     | Cl      | K      | 149268    | 15.9255 $\pm$ 0.0993% |
| 20     | Ca      | K      | 48569     | 0.5964 $\pm$ 0.0124%  |
| 24     | Cr      | K      | 440142    | 1.3190 $\pm$ 0.0058%  |
| 26     | Fe      | K      | 104340    | 0.1417 $\pm$ 0.0022%  |
| 29     | Cu      | K      | 15856     | 0.0076 $\pm$ 0.0008%  |
| 30     | Zn      | K      | 14661     | 0.0051 $\pm$ 0.0006%  |
| 33     | As      | K      | 14613     | 0.0024 $\pm$ 0.0003%  |
| 38     | Sr      | K      | 9340      | 0.0009 $\pm$ 0.0002%  |
| 39     | Y       | K      | 984       | < 0.0001%             |
| 40     | Zr      | K      | 4196      | 0.0004 $\pm$ 0.0001%  |

\*LE – light elements – recalculation of non-detectable light elements using backscattering intensity (theoretical mean atomic weight of light elements is 13 g/mol)

Spectrum – Sample Bk2 – Light elements (Al – Fe)

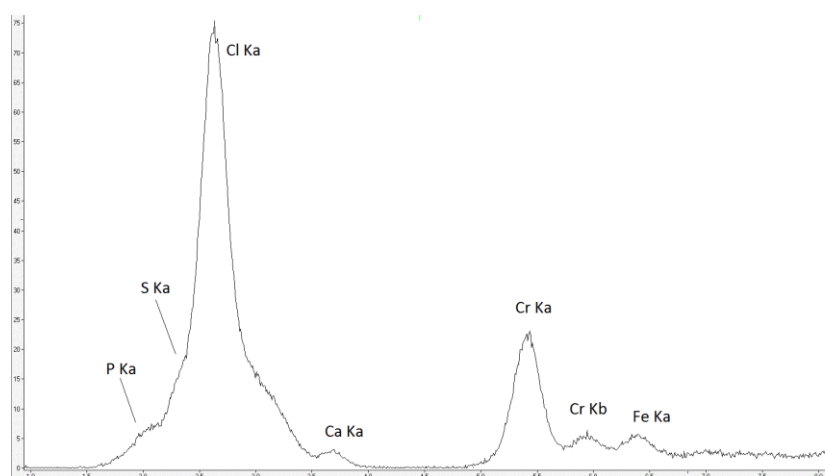

Spectrum – Sample Bk1 – Heavy elements (V – U)

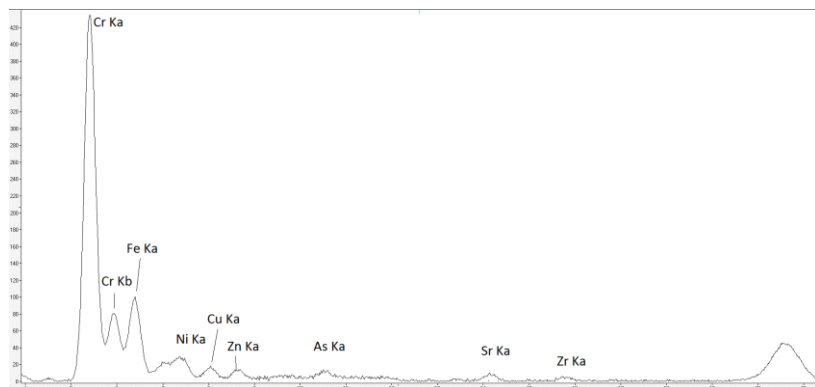

**Figure S9.** Report from EDXRF analysis of alternative BC sorbent saturated with (BAC)<sub>4</sub>RB8 ion pair.

**Table S1.** A comparison of economic costs of tested separation methods of RB8 dye from model (1 g L<sup>-1</sup>) or real (7 g L<sup>-1</sup>) wastewater.

| Method                             | Type of wastewater | Quantity of used reagents per gram of OB dye | Reaction time  | Efficiency of decolorization | Price for optimized dosages per kilogram of RB8 * |
|------------------------------------|--------------------|----------------------------------------------|----------------|------------------------------|---------------------------------------------------|
| Ion exchange <i>via</i> IL         | Model              | 2 g BAC                                      | 30 min.        | 99.1%                        | 39.6 \$                                           |
| Ion exchange <i>via</i> IL         | Model              | 6 g A336                                     | 30 min.        | 98.9%                        | 130 \$                                            |
| Adsorption                         | Model              | 40 g PAC                                     | 180 min.       | 97.9%                        | 260 \$                                            |
| Adsorption                         | Model              | 40 g BC                                      | 300 min.       | 70.8%                        | 30 \$                                             |
| Adsorption                         | Model              | 40 g BT                                      | 300 min.       | 18.9%                        | 3.8 \$                                            |
| <b>Co-action of sorbent and IL</b> | <b>Model</b>       | <b>2 g BC + 1.5 g BAC</b>                    | <b>30 min.</b> | <b>99%</b>                   | <b>31.2 \$</b>                                    |
| <b>Co-action of sorbent and IL</b> | <b>Model</b>       | <b>1 g BT + 2 g BAC</b>                      | <b>30 min.</b> | <b>98.2%</b>                 | <b>39.7 \$</b>                                    |
| Ion exchange <i>via</i> IL         | Real               | 2 g BAC                                      | 30 min.        | 86.3%                        | 39.6 \$                                           |
| Adsorption                         | Real               | 40 g BC                                      | 300 min.       | 51.2%                        | 30 \$                                             |
| Adsorption                         | Real               | 40 g PAC                                     | 300 min.       | 92.6%                        | 260 \$                                            |
| Adsorption                         | Real               | 40 g BT                                      | 300 min.       | 18.6%                        | 3.8 \$                                            |
| <b>Co-action of sorbent and IL</b> | <b>Real</b>        | <b>8 g BC + 4 g BAC</b>                      | <b>90 min.</b> | <b>98.6%</b>                 | <b>85.2 \$</b>                                    |
| <b>Co-action of sorbent and IL</b> | <b>Real</b>        | <b>4 g BT + 2.9 g BAC</b>                    | <b>60 min.</b> | <b>96.1%</b>                 | <b>57.8 \$</b>                                    |

\* Note: Prices according to Global Trade Magazine (<https://www.globaltrademag.com>) and ref. [56].

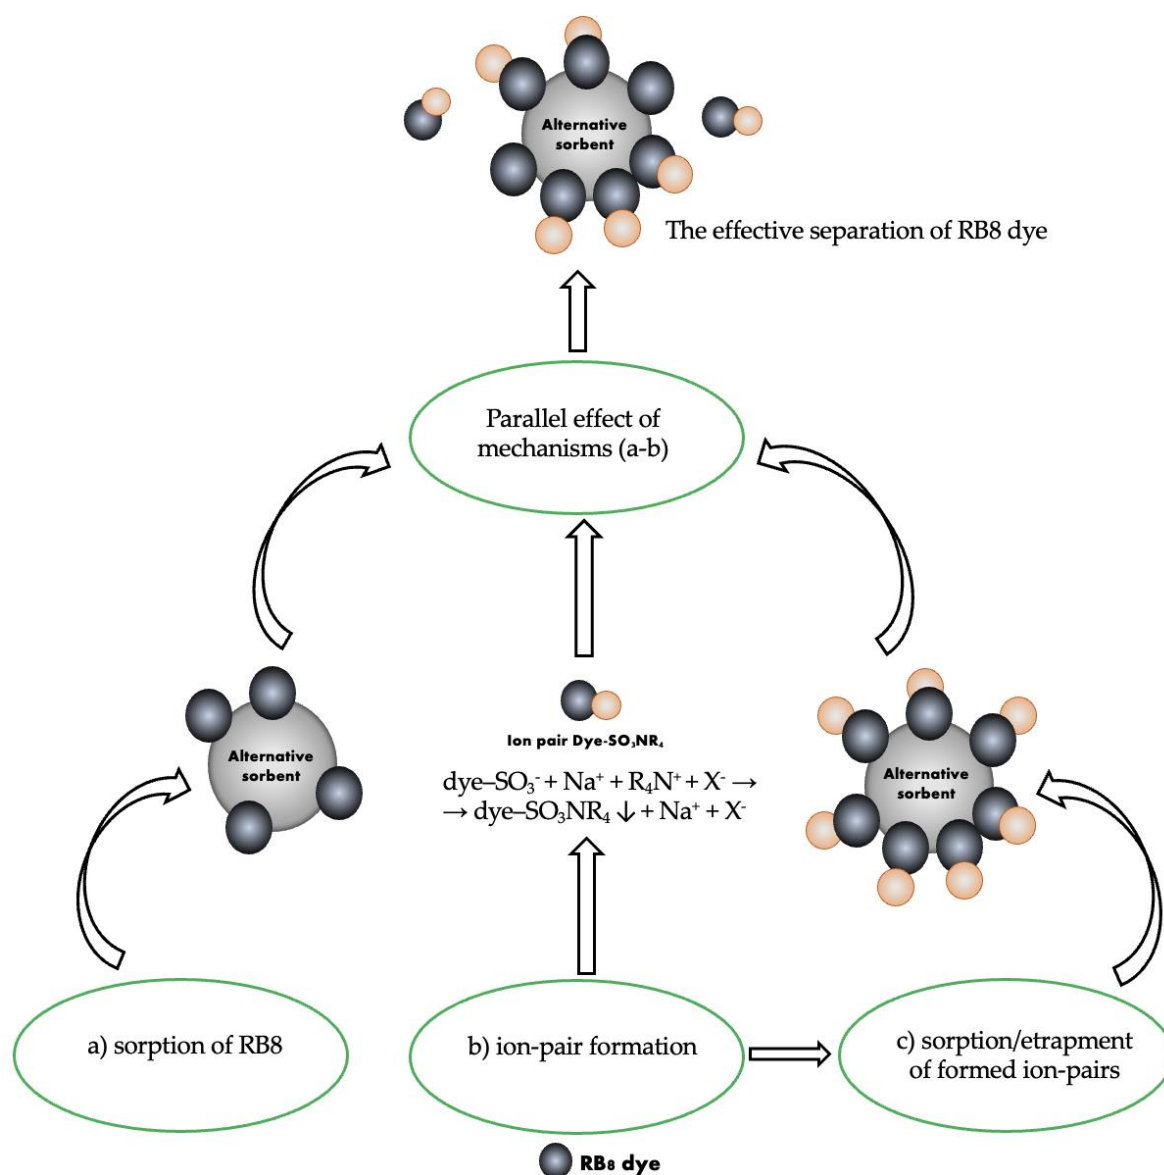

**Scheme S2.** The proposed mechanisms of separation of RB8 dye from waste-waters.
