# Supplementary material for: Co-Action of Ionic Liquids with Alternative Sorbents for Removal of Reactive Azo Dyes from Polluted Wastewater Streams
Source: MDPI journal article supplement (doi:10.3390/app14020673), 2024-01-12
Supplement: s1 [file s1 › File S2SupplementaryMaterials.xlsx]

## Sheet: sorption on BC
				DE	RE COD	5 hours of action
			blank	5.36	0
			20 g/L	40	13.43
			30 g/L	60.71	48.56
			40 g/L	70.83	61.23
			50 g/L	78.93	67.15

## Sheet: Sorption on BT
			DE	RE COD	5 hours of action
		blank	5.36	0
		15 g/L	6.7	0
		25 g/L	9.8	0
		30 g/L	11.2	2.1
		40 g/L	18.9	10.7
		50 g/L	26.1	15.7

## Sheet: log Pow
		Log Pow	Log Pow 1	Log Pow 2	avarage	smodch
			-1.26	-1.42	-1.34	0.08
		RB8-BAC	1.84	1.57	1.705	0.135
		RB8-A336	2.36	2.14	2.25	0.11

## Sheet: BAC action
Dosage	DE	RE COD
1 g/L	33.9009	-
2 g/L	99.1202	88.7879
3 g/L	95.7624	61.3
4 g/L	99.3946	24.5
5 g/L	52.2891	0
6 g/L	0	-
10 g/L	0	-
23 g/L	0.603865	-
Dosage	DE	RE COD
2 g/L BC	5.2	0
2 g/L BT	0	0
1.5 g/L BAC	52.6
1.5 g/L BAC + 1.5 g/L BC	61.6
1.5 g/L BAC + 2 g/L BC	98.9977	94.5655
1.5 g/L BAC + 1.5 g/L BT	59.6	54.2
1.5 g/L BAC + 2 g/L BT	84.3	81.7
2 g/L BAC	97.0179	88.4817
2 g/L BAC + 1 g/L BC	99.3338	87.2552
2 g/L BAC + 2 g/L BC	98.9672	96.1387
2 g/L BAC + 1 g/L BT	98.1735	94.6345
2 g/L BAC + 2 g/L BT	96.5345	93.2966
	RE AOX
2 g/L BAC	74.04
2 g/L BAC + 2 g/L BC	97.66
2 g/L BAC + 2 g/L BT	84.15

## Sheet: A336 action
Dosage	DE	RE COD
1 g/L	35.1341	-
2 g/L	42.8465	-
3 g/L	69.9472	-
4 g/L	52.9726	-
5 g/L	66.9523	-
6 g/L	98.9155	39.2
7 g/L	99.3711	42.6702
10 g/L	93.7779	-
13 g/L	92.1739	-
Dosage	DE	RE COD
15 g/L BC	37.3	29.6
15 g/L BT	0	0
3 g/L A336	69.9472	-
3 g/L A336 + 15 g/L BC	67.8356	40.7143
3 g/L A336 + 15 g/L BT	59.6	36.4
30 g/L BC	60.71	48.56
30 g/L BT	2.5	2.1
6 g/L A336	98.9155	39.2
6 g/L A336 + 30 g/L BC	99.8199	61.3
6 g/L A336 + 30 g/L BT	95.7007	55.1412
13 g/L A336	92.1739	-
13 g/L A336 + 30 g/L BC	99.5475	63.8776

## Sheet: kinetics
		BC	BT	BT+BAC	BC+BAC	PAC	MTM
	t / min	Content / %	Content / %	Content / %	Content / %	Content / %	Content / %
	0	100	100	100	100	100	100
	5	91.25	92	49.637	45.67	81.26	90.16
	10	78.93	89	32.148	30.23	59.73	84.15
	20	65.12	88.91	7.123	6.174	40.26	78.43
	30	55.261	87.13	2.16	0.82	27.824	75.13
	60	42.5	83.69	1.98	0.78	18.461	66.716
	90	40.26	81.45	2.03	0.8	8.761	62.722
	120	38.0952	80	2.09	0.81	5.147	60.23
	180	36.53	78.73	2	0.83	2.06	55
	240	32.59	76.59	2.12	0.87	2.12	51.23
	300	29.1667	75.87	2.07	0.9	2.09	51.56
	360	28.54	75.26	1.96	0.81	2.05	51.34

## Sheet: Real wastewater
Dosage	DE	RE COD
blank	8.94	3.26
40 g/L BC	20.1417	23.1132
280 g/L BC	51.2	47.6
100 g/L PAC	56.7	49.7
280 g/L PAC	92.6	74.3
10.5 g/L BAC + 14 g/L BC	38.4462	22.3585
10 g/L BAC + 27 g/L BC	45.0502	35.7
10 g/L BAC + 40 g/L BC	45.8257	36.4
14 g/L BAC + 28 g/L BC	51.2	45.6
14 g/L BAC + 42 g/L BC	65.1	59.7
20 g/L BAC + 27 g/L BC	55.3376	34.6
20 g/L BAC + 40 g/L BC	55.4288	37.2
21 g/L BAC + 42 g/L BC	58.9	51.2
21 g/L BAC + 63 g/L BC	99.9	84.5
28 g/L BAC + 56 g/L BC	98.6	78.7
30 g/L BAC + 40 g/L BC	74.0192	56.1
42 g/L BAC + 42 g/L BC	89.9	72.3
							PAC	BC+BAC	BT+BAC
						Time of action (min.)	Content / %	Content / %	Content / %
						0	100	100	100
						5	93.1857	87.6714	81.6
						10	85.2429	69.6286	62.3
						20	73.2714	62.3429	37.6
						30	54.2	43.3	15.06
						60	42.8857	26.3571	4.1
						90	26.8429	15.7571	3.7
						120	16.2	14.2	3.8
						180	11.4286	14.2429	3.2
						240	10.3329	14.3	3.3
						300	10.2857	14.1	3.1
						360	10.2	14.2729	3
Dosage	DE	RE COD
blank	8.94	3.26
40 g/L BT	14.576
280 g/L BT	18.6396	0
14 g/L BAC	86.3
14 g/L BAC + 7 g/L BT	90.636	84.5
10 g/L BAC + 28 g/L BT	91.4488
10 g/L BAC + 40 g/L BT	87.1731
20 g/L BAC + 28 g/L BT	96.0954	90.7
30 g/L BAC + 40 g/L BT	97.6502	95.7
42 g/L BAC + 42 g/L BT	97.1025	94.5
56 g/L BAC + 42 g/L BT	99.1201	95.6
